# Supplementary material
Source: Research Square preprint supplement (doi:10.21203/rs.3.rs-8702436/v1)
Supplement: Supplementary file 1 [file 66dcf879c85863b6ac483aee.docx]

**Supplementary File 1:** IGLOo Model for sustainable return to work

| **Level of Resource** | **Example of resources** |
| --- | --- |
| Individual | Work-related self-efficacy, health promoting and self-management strategies, job crafting |
| Group | Understanding and support of colleagues throughout the return-to-work journey |
| Leader | Knowledge, skills and abilities of leaders and line managers to support the return-to-work journey, implement work adjustments and manage the wider team |
| Organisation | Knowledge and skills of Human Resources and Occupational Health professionals, policies and practices, training and development opportunities, job design |
| Outside | Healthcare and charity provision, family and friends outside of work |

Adapted from Nielsen et al (2018).

**Supplementary File 2:** List ofProtocol Amendments

| 1 | In phase 2, workers invited during the eligibility window (15–42 days of sick leave) were included even if they responded late due to illness. Managers who delayed returning consent forms due to workload were included if invited within the eligibility window |
| --- | --- |
| 2 | One intervention organisation missed the first two months of Phase 2 recruitment due to staffing issues and relied on senior managers outside central HR to send invitations; the effectiveness of this approach is unclear due to missing updates |
| 3 | due to HR capacity constraints, some organisations could not provide sick leave data, so only self-reported data were used for consistency. |

**Supplementary File 3:** Summary of each organisation’s characteristics

| **Group** | **Organisation number** | **Size** | **Type** | **Workers on LTS+ 12 months prior to study start** | **LTSA++ rate** | **Job title of organisational contact** |
| --- | --- | --- | --- | --- | --- | --- |
| Intervention | 1 | ~3,500 | NHS | 588 | ~17% | Head of HR |
| 2* | ~17,000 | NHS | 957 | ~6% | HR Business Partner |
| 3 | ~2,100 | Higher Education | ~56 | ~3% | HR Partner |
| 4 | ~2,006 | Transport | 160 | ~8% | Wellbeing coordinator |
| Control | 5 | 3,337 | Police | 445 | 13% | HR Services Manager |
| 6 | ~6,000 | NHS | 1,834 | ~31% | HR Business Partner |
| 7 | 2,135 | Local Authority | 187 | 9% | OH Safety & Wellbeing Manager |
| 8 | ~961 | Fire & Rescue | 105 | ~11% | Health and Wellbeing Manager |
| 9 | 6,766 | NHS | 929 | 14% | Chief People Officer |

+Long-term sick leave; ++long-term sick leave absence; *In this organisation, the pilot was launched across five directorates with a total size of 5,640

**Supplementary file 4:** Phase 1 intervention web page visits by participants

| **Page name** | **Participants**  **n=57**  **(%)** | **Mean page visits [SD]** | **Min– Max page visits** | **Mean minutes per page [SD]** | **Median**  **minutes [Interquartile range]** | **Min – Max minutes** |
| --- | --- | --- | --- | --- | --- | --- |
| Organisation level introduction page | 53 (93.0%) | 2.4 [1.4] | 1-6 | 60.2 [394.9] | 2.1 [6.4] | 0.2-2880.0 |
| Introduction to hub and toolkits | 35 (61.4%) | 1.8 [1.0] | 1-4 | 3.4 [7.9] | 1.0 [2.3] | 0.10-46.0 |
| Foundations: Where are we now? | 40 (70.1%) | 1.9 [1.2] | 1-5 | 8.8 [11.1] | 7.0 [11.3] | 0.02-51.0 |
| RTW policies and practices | 38 (66.7%) | 1.8 [1.3] | 1-8 | 51.2 [234.8] | 6.0 [17.4] | 0.02-1454.0 |
| Engaging stakeholders for a sustainable return to work | 38 (66.7%) | 1.7 [1.0] | 1-5 | 5.8 [12.9] | 3.5 [5.8] | 0.02-10.0 |
| Setting up for success in your organisation | 35 (61.4%) | 1.3 [0.6] | 1-3 | 6.4 [11.1] | 2.2 [8.8] | 0.02-62.0 |

**Supplementary File 5a:** Website analytics and interview data on Phase 2 and 3 intervention participant workers

| **Page name** | **Participants**  (n=43)  n (%) | **Mean page visits** [SD] | **Min– Max page visits** | **Mean minutes per page** [SD] | **Median**  **minutes** [Interquartile range] | **Min – Max minutes** | **Participants interviewed at Phase 2**  (n=27)  n (%) |
| --- | --- | --- | --- | --- | --- | --- | --- |
| Employee intro page | 33 (76.7%) | 3.7 [3.4] | 1-15 | 28.3 [74.7] | 4.8 [18.1] | 0.2-328.7 | 22 (81.5%) |
| Step 1: initial sick leave | 24 (55.8%) | 1.8 [1.7] | 1-8 | 4.9 [7.5] | 0.6 [10.1] | 0.2-29.8 | 14 (52.0%) |
| Step 2: during sick leave | 22 (51.1%) | 2.1 [1.2] | 1-5 | 39.5 [86.9] | 5.4 [35.4] | 0.3-342.1 | 22 (81.5%) |
| Step 3: preparing for return to work | 26 (60.5%) | 2.2 [1.5] | 1-6 | 6.5 [10.0] | 1.8 [9.8] | 0.2-43.8 | 20 (74.1%) |
| Step 4: first week back at work | 19 (45.0%) | 2.4 [1.7] | 1-6 | 3.3 [3.4] | 3.0 [4.9] | 0.2-11.6 | 17 (63.0%) |
| Step 5: keeping healthy and productive at work | 18 (41.9%) | 2.8 [2.0] | 1-9 | 3.4 [4.0] | 1.9 [6.0] | 0.2-13.1 | 18 (66.7%) |
| Accessed steps 1-5 | 10 (23.3%) | - | | | | | |
| Accessed steps 2-5 | 14 (32.6%) | - | | | | | |
|  | | | | | | | **Interviewed at Phase 3** (n=18) |
| Step 6: job crafting | 13 (30.2%) | 3.0 [1.8] | 1-7 | 28.5 [46.9] | 3.0 [53.5] | 0.2-120.0  [120.0] | 14 (77.8%) |
| Accessed all steps 1-6 | 8 (18.6%) | **-** | | | | | |

**Supplementary File 5b:** Website analytics and interview data on Phase 2 and 3 intervention participant managers

| **Page name** | **Participants**  (n=20)  n (%) | **Mean page visits** [SD] | **Min– Max page visits** | **Mean minutes per page**  [SD] | **Median**  **minutes** [Interquartile range] | **Min – Max minutes** | **Participants interviewed at Phase 2**  (n=12)  n (%) |
| --- | --- | --- | --- | --- | --- | --- | --- |
| Line manager intro page | 11 (55.0%) | 2.4 [1.6] | 1-6 | 2.4 [3.0] | 2.0 [3.7] | 0.2-10.3 | 7 (58.3%) |
| Step 1: initial sick leave | 6 (30.0%) | 1.7 [0.8] | 1-3 | 5.5 [7.3] | 3.6 [8.7] | 0.1-20.0 | 7 (58.3%) |
| Step 2: during sick leave | 7 (35.0%) | 1.4 [0.8] | 1-3 | 1.8 [2.3] | 1.0 [1.8] | 0.1-6.6 | 9 (75.0%) |
| Step 3: preparing for return to work | 9 (45.0%) | 1.2 [0.7] | 1-3 | 5.3 [5.1] | 4.4 [7.8] | 0.3-15.0 | 9 (75.0%) |
| Step 4: first week back at work | 8 (40.0%) | 1.3 [0.5] | 1-2 | 1.7 [2.1] | 1.0 [3.0] | 0.2-6.0 | 9 (75.0%) |
| Step 5: keeping healthy and productive at work | 8 (40.0%) | 1.4 [0.7] | 1-3 | 9.3 [22.5] | 0.6 [3.4] | 0.2-60.3 | 6 (50.0%) |
| Accessed all steps 1-5 | 4 (20.0%) | - | | | | | |
| Accessed all steps 2-5 | 6 (30.0%) | - | | | | | |
|  | | | | | | | **Interviewed at Phase 3** (n=6) |
| Step 6: job crafting | 6 (30.0%) | 1.2 [0.4] | 1-2 | 1.8 [3.1] | 0.8 [2.7] | 0.2-8.0 | 1 (16.7%) |
| Accessed all steps 1-6 | 3 (15.0%) | - | | | | | |

| **Step** | **Section** | **No. of participants who gave a rating** | **Rated ‘Useful’ or ‘Extremely Useful’** |
| --- | --- | --- | --- |
| Step 1 | Main text  Step 1: Action Checklist  Step 1: Communication Checklist | 12  9  8 | 10  7  7 |
| Step 2 | Main text  Step 2: Action Checklist  Step 2: Communication Checklist  Step 2: Support Network Exercise  Step 2: Action Plan Exercise  Step 2: Ways to Wellbeing Exercise  Step 2: Diary Exercises  Step 2: Thoughts About Work Exercise | 19  9  8  14  16  14  8  11 | 16  8  5  13  15  13  8  11 |
| Step 3 | Main text  Step 3: Action Checklist  Step 3: Readiness to Return Scale  Step 3: Questions & Concerns Exercise  Step 3: Possible Work Adjustments Exercise  Step 3: Return to Work Conversation Guide | 18  11  11  7  12  9 | 14  11  10  6  12  8 |
| Step 4 | Main text  Step 4: Action Checklist | 14  13 | 13  13 |
| Step 5 | Main text  Step 5: Action Checklist | 18  12 | 18  12 |
| Step 6 | Main text  Step 6: Preparing for job crafting  Step 6: Exploring job crafting possibilities:  Step 6: Developing a job crafting plan  Step 6: Action checklist: Discuss and agree a job crafting plan | 12  7  6  6  1 | 11  6  5  5  1 |

**Supplementary File 6a:** Usefulness of toolkit checklists and exercises for intervention participant workers (Phase 2 n=23; Phase 3 n=16)

Note: There was some missing data on these items; not everyone who said they had used the Step/Checklist/Exercise provided a rating.

**Supplementary File 6b:** Usefulness of toolkit intervention participant managers (Phase 2 n=12; Phase 3 n=6)

|  |  | **No. of participants who gave a rating** | **Rated ‘Useful’ or ‘Extremely Useful’** |
| --- | --- | --- | --- |
|  | Introductory information | 9 | 8* |
| Introductory video | 7 | 7 |
| Return to work conversation guide | 3 | 3 |
| Step 1 | Initial sick leave information | 8 | 8 |
| Action checklist: initial Steps | 4 | 4 |
| Communications: making first contact | 2 | 2 |
| Step 2 | During sick leave: information on what to do | 10 | 9 |
| Action check list: during sick leave | 5 | 5 |
| Communication checklist: keeping in touch | 4 | 4 |
| Communication checklist: coordinated approach | 4 | 4 |
| Step 3 | Step 3: Preparing for return-to-work information | 9 | 9 |
| Step 3 action checklist: preparing for the return | 6 | 6 |
| Step 3 communication checklist: arranging the meeting | 4 | 4 |
| Exercise: Possible work adjustments | 3 | 3 |
| First days and weeks back at work | 11 | 10* |
| Step 4 | Action checklist: supporting the employee | 5 | 5 |
| Conversation checklist: checking with the employee | 3 | 3 |
| Step 5 | Keeping healthy and productive information | 7 | 7 |
| Action checklist: ongoing review | 4 | 4 |
| Step 6 | Job crafting information | 1 | 1 |

One participant was not asked the question on usefulness

**Supplementary File 7:**Usefulness of coaching for intervention participants workers *(n=17)*

| **How useful did you find the coaching in terms of…** | **No. who answered** | **Agree**  **(n %)** | **Totally Agree**  **(n %)** |
| --- | --- | --- | --- |
| Formulating plans to use the toolkit and stay on track with the toolkit | 17 | 2 (12%) | 15 (88%) |
| Setting goals and identifying actions to support your health and wellbeing | 17 | - | 17(100%) |
| Finding solutions to return to work barriers | 13* | 4 (39%) | 9 (61%) |
| Feeling generally supported by the coach | 17 | - | 17 (100%) |

*Four participants did not use the coaching in this way because they had already returned to work when they began coaching or used it to focus primarily on supporting their wellbeing. 

**Supplementary File 8:** Primary and secondary research outcome measures

| **Outcome** | **Time** | **Intervention group** | **N** | **Control group** | **N** | **Effect size (95% CI)[[1]](#footnote-1)** |
| --- | --- | --- | --- | --- | --- | --- |
| Days to RTW |  | 94 (49,157) | 50 | 60 (34, 86) | 92 | 0.88 (0.49, 1.56) |
| Days to RTW (employee reported only) |  | 100 (50, 158) | 36 | 59 (39.5, 80.5) | 49 | 0.97 (0.56, 1.68) |
| Days to RTW (adjusted for covariates) |  | n/a |  | n/a |  | 0.91 (0.48, 1.70) |
| Returned to work? |  | 79% | 63 | 72% | 128 | 1.51 (0.51, 3.26) |
| Sustainably returned to work? |  | 70% | 43 | 65% | 69 | 1.23 (0.41, 3.58) |
| Depression | Baseline | 22.1 (7.4) | 43 | 20.6 (6.2) | 69 | n/a |
|  | 3 months | 17.4 (6.8) | 33 | 16.9 (4.7) | 52 | -0.11 (-2.69, 2.10) |
|  | 6 months | 16.4 (6.6) | 30 | 16.3 (5.7) | 45 | -0.68 (-3.92, 2.05) |
|  | 9 months | 17.5 (6.8) | 30 | 15.0 (5.2) | 47 | 1.44 (-1.15, 3.91) |
|  | 12 months | 16.4 (6.0) | 28 | 15.0 (4.8) | 46 | 0.14 (-3.09, 3.15) |
| Anxiety | Baseline | 17.3 (6.3) | 43 | 16.1 (6.6) | 69 | n/a |
|  | 3 months | 12.6 (5.9) | 33 | 13.7 (5.6) | 52 | -1.83 (-4.52, 0.68) |
|  | 6 months | 13.1 (6.0) | 30 | 11.7 (4.5) | 44 | 1.00 (-1.34, 3.34) |
|  | 9 months | 14.7 (6.2) | 30 | 11.2 (3.8) | 47 | 2.61 (0.39, 4.61) |
|  | 12 months | 12.7 (6.0) | 28 | 11.8 (4.8) | 46 | 0.09 (-1.81, 2.69) |
| Burnout (work-related) | 3 months | 3.3 (0.9) | 27 | 3.6 (0.8) | 38 | -0.12 (-0.66, 0.43) |
|  | 6 months | 3.4 (0.9) | 28 | 3.3 (0.8) | 40 | 0.09 (-0.38, 0.52) |
|  | 9 months | 3.3 (0.7) | 28 | 3.2 (0.8) | 42 | 0.14 (-0.22, 0.50) |
|  | 12 months | 3.3 (1.0) | 22 | 3.3 (0.9) | 40 | 0.04 (-0.43, 0.51) |
| Burnout (non-work-related) | Baseline | 3.7 (0.8) | 43 | 3.4 (0.8) | 69 | n/a |
|  | 3 months | 3.6 (0.8) | 6 | 3.8 (0.5) | 14 | -0.34 (-0.89, 0.22) |
|  | 6 months | 2.7 (0.9) | 2 | 3.5 (0.9) | 5 | -1.58 (-3.64, 0.46) |
|  | 9 months | 4.2 (0.2) | 2 | 3.8 (1.1) | 5 | -0.15 |
|  | 12 months | 3.5 (0.6) | 6 | 3.5 (0.8) | 6 | -0.03 (-0.82, 0.81) |
| Quality of life | Baseline | 0.6 (0.3) | 43 | 0.6 (0.2) | 69 | n/a |
|  | 3 months | 0.2 (2.3) | 35 | 0.5 (1.4) | 53 | -0.33 (-1.09, 0.45) |
|  | 6 months | 0.3 (1.8) | 31 | 0.5 (1.5) | 45 | -0.17 (-1.02, 0.55) |
|  | 9 months | 0.7 (0.2) | 30 | 0.3 (2.0) | 49 | 0.34 (-0.36, 1.05) |
|  | 12 months | 0.7 (0.2) | 28 | 0.7 (0.2) | 46 | 0.02 (-0.10, 0.15) |
| Confidence in discussing health with manager | Baseline | 5.0 (2.0) | 43 | 4.9 (2.1) | 69 | n/a |
|  | 3 months | 5.3 (2.1) | 33 | 5.0 (2.0) | 51 | 0.28 (-0.47, 0.96) |
|  | 6 months | 4.9 (2.0) | 30 | 5.0 (2.0) | 44 | 0.16 (-0.63, 0.86) |
|  | 9 months | 4.7 (2.1) | 29 | 5.4 (1.8) | 47 | -0.58 (-1.34, 0.18) |
|  | 12 months | 5.2 (1.8) | 28 | 4.9 (2.0) | 46 | 0.49 (-0.43, 1.25) |
| Confidence in discussing health with colleagues | Baseline | 3.9 (2.1) | 43 | 4.3 (2.2) | 69 | n/a |
|  | 3 months | 4.5 (2.2) | 33 | 4.3 (2.0) | 51 | 0.32 (-0.39, 1.03) |
|  | 6 months | 4.4 (1.9) | 30 | 4.5 (1.9) | 44 | 0.21 (-0.44, 0.87) |
|  | 9 months | 4.3 (2.0) | 29 | 4.9 (1.8) | 47 | -0.49 (-1.16, 0.18) |
|  | 12 months | 4.4 (1.9) | 28 | 4.5 (2.1) | 46 | 0.02 (-0.74, 0.78) |
| Confidence in discussing health with friends & family | Baseline | 5.0 (1.9) | 43 | 5.7 (1.6) | 69 | n/a |
|  | 3 months | 5.1 (1.7) | 33 | 5.5 (1.7) | 51 | -0.20 (-1.17, 0.68) |
|  | 6 months | 5.1 (1.8) | 30 | 5.5 (1.5) | 44 | -0.02 (-0.63, 0.68) |
|  | 9 months | 5.0 (1.9) | 29 | 5.7 (1.4) | 47 | -0.06 (-0.69, 0.55) |
|  | 12 months | 5.4 (1.8) | 28 | 5.7 (1.5) | 46 | 0.04 (-0.65, 0.72) |
| Satisfaction with frequency of communication on sick leave | Baseline | 3.5 (1.1) | 43 | 3.4 (1.3) | 69 | n/a |
|  | Follow-up | 3.9 (1.2) | 35 | 3.7 (1.4) | 52 | 0.24 (-0.27, 0.69) |
| Satisfaction with support from manager on sick leave | Baseline | 3.6 (1.1) | 43 | 3.6 (1.4) | 69 | n/a |
|  | Follow-up | 3.9 (1.2) | 35 | 3.7 (1.3) | 52 | 0.24 (-0.26, 0.66) |
| Job satisfaction | Baseline | 4.6 (1.8) | 43 | 4.5 (1.5) | 69 | n/a |
|  | 3 months | 4.5 (1.8) | 27 | 4.5 (1.6) | 38 | -0.02 (-0.65, 0.61) |
|  | 6 months | 4.5 (1.4) | 28 | 4.7 (1.7) | 40 | -0.20 (-0.83, 0.55) |
|  | 9 months | 4.6 (1.5) | 28 | 5.0 (1.5) | 42 | -0.39 (-1.04, 0.23) |
|  | 12 months | 4.4 (1.8) | 22 | 4.7 (1.4) | 40 | -0.23 (-0.98, 0.53) |
| Intention to quit | Baseline | 2.5 (1.1) | 43 | 2.7 (1.2) | 69 | n/a |
|  | 3 months | 2.8 (1.3) | 33 | 2.7 (1.2) | 51 | 0.26 (-0.11, 0.64) |
|  | 6 months | 2.6 (1.3) | 30 | 2.6 (1.2) | 44 | -0.01 (-0.47, 0.48) |
|  | 9 months | 2.7 (1.3) | 29 | 2.5 (1.3) | 47 | 0.28 (-0.24, 0.79) |
|  | 12 months | 2.6 (1.3) | 28 | 2.5 (1.3) | 46 | 0.15 (-0.39, 0.72) |
| Readiness to stay | 3 months | 3.7 (0.7) | 27 | 3.6 (0.6) | 38 | 0.13 (-0.18, 0.48) |
|  | 6 months | 3.7 (0.7) | 29 | 3.7 (0.6) | 40 | 0.00 (-0.31, 0.34) |
|  | 9 months | 3.7 (0.8) | 28 | 3.8 (0.6) | 43 | -0.14 (-0.48, 0.19) |
|  | 12 months | 3.8 (0.8) | 22 | 3.8 (0.6) | 40 | 0.00 (-0.34, 0.34) |
| Line manager competency - managing sickness absence | Follow-up | 3.9 (1.2) | 33 | 3.6 (1.2) | 47 | 0.23 (-0.31, 0.77) |
| Line manager competency - managing RTW | Follow-up | 3.8 (1.0) | 34 | 3.3 (1.3) | 43 | 0.41 (-0.12, 0.95) |
| Manager support | 3 months | 3.4 (0.9) | 27 | 3.5 (0.9) | 38 | -0.09 (-0.54, 0.39) |
|  | 6 months | 3.3 (0.9) | 28 | 3.3 (1.0) | 40 | -0.06 (-0.67, 0.52) |
|  | 9 months | 3.4 (0.9) | 28 | 3.7 (0.9) | 42 | -0.31 (-0.79, 0.13) |
|  | 12 months | 3.3 (1.0) | 22 | 3.5 (0.9) | 40 | -0.27 (-0.78, 0.20) |
| Job crafting | 3 months | 3.0 (0.4) | 27 | 3.1 (0.6) | 38 | -0.23 (-0.62, 0.16) |
|  | 6 months | 2.9 (0.5) | 28 | 2.9 (0.4) | 40 | -0.06 (-0.28, 0.16) |
|  | 9 months | 2.9 (0.4) | 28 | 3.0 (0.5) | 42 | -0.12 (-0.34, 0.09) |
|  | 12 months | 2.9 (0.5) | 22 | 3.0 (0.5) | 40 | -0.16 (-0.35, 0.14) |
| Colleague support | 3 months | 3.6 (1.0) | 27 | 3.9 (1.1) | 38 | -0.29 (-0.81, 0.23) |
|  | 6 months | 3.8 (1.0) | 28 | 3.9 (1.2) | 40 | -0.05 (-0.59, 0.49) |
|  | 9 months | 3.7 (1.0) | 28 | 4.2 (0.8) | 42 | -0.51 (-0.97, -0.08) |
|  | 12 months | 3.5 (1.0) | 22 | 4.0 (0.9) | 40 | -0.45 (-1.01, 0.04) |
| Job autonomy | 3 months | 4.6 (1.3) | 27 | 4.4 (1.5) | 38 | 0.24 (-0.45, 0.94) |
|  | 6 months | 4.7 (1.3) | 28 | 4.4 (1.4) | 40 | 0.36 (-0.41, 1.03) |
|  | 9 months | 4.6 (1.3) | 28 | 4.5 (1.7) | 42 | 0.14 (-0.58, 0.87) |
|  | 12 months | 4.6 (1.5) | 22 | 4.1 (1.7) | 40 | 0.50 (-0.38, 1.34) |
| Job demands | 3 months | 2.6 (1.0) | 27 | 3.0 (1.0) | 38 | -0.38 (-1.02, 0.26) |
|  | 6 months | 2.5 (0.8) | 28 | 2.7 (0.8) | 40 | -0.26 (-0.81, 0.28) |
|  | 9 months | 2.5 (0.7) | 28 | 2.6 (0.8) | 42 | -0.08 (-0.49, 0.33) |
|  | 12 months | 2.5 (0.9) | 22 | 2.7 (0.9) | 40 | -0.13 (-0.60, 0.37) |
| **Results from managers’ surveys** | | | | | | |
| Manager - competence in managing sickness absence | Follow-up | 5.0 (0.3) | 14 | 4.7 (0.5) | 46 | 0.28 (0.01, 0.55) |
| Manager - competence in managing RTW | Follow-up | 5.0 (0.3) | 14 | 4.4 (0.7) | 46 | 0.52 (0.16, 0.88) |
| Manager - confidence in managing mental health issues | Baseline | 3.5 (0.8) | 20 | 3.9 (0.7) | 62 | n/a |
|  | 3 months | 4.2 (0.7) | 14 | 4.0 (0.6) | 50 | 0.33 (0.08, 0.58) |
|  | 6 months | 4.1 (0.7) | 7 | 4.0 (0.5) | 40 | 0.25 (-0.08, 0.59) |
|  | 9 months | 4.5 (0.4) | 5 | 4.1 (0.5) | 34 | 0.32 (-0.01, 0.65) |
|  | 12 months | 4.5 (0.6) | 7 | 4.2 (0.4) | 28 | 0.25 (-0.08, 0.57) |
| Manager job demands | Baseline | 2.8 (1.1) | 20 | 2.8 (0.9) | 62 | n/a |
|  | 12 months | 2.5 (1.0) | 7 | 2.8 (0.8) | 28 | -0.28 (-0.64, 0.08) |
| Manager autonomy | Baseline | 5.4 (1.3) | 20 | 5.2 (1.3) | 62 | n/a |
|  | 12 months | 6.0 (1.1) | 7 | 5.3 (1.2) | 28 | 0.58 (-0.97, 2.13) |

1. Effect size is adjusted mean difference, except for % returned to work/sustainably returned to work which is an adjusted odds ratio, and Days to RTW, which is an adjusted hazard ratio. Statistics in main columns are mean (SD), except for % returned to work (percentage), and Days to RTW, which is median (IQR) [↑](#footnote-ref-1)
